# Supplementary material
Source: Springer Nature journal article supplement (https://www.springermedizin.de/resource/supplementary/12884_2013_840_MOESM1_ESM.pdf/9458322)
Supplement: MOESM1 [file 9458322]

**Recruit & screen women in second trimester (n=1200)**

Q 1

**Baseline:** Personal & obstetric details & birth preference; EPDS; CBSEI; WDEQ-A; DCS; CKS; EQ5D

24-34 wks

**Random allocation:** Women with high childbirth fear will be randomised to intervention or control group (standard care). .

**Intervention group:** n = 150

**Control group:** n=150

Q 2

**36 weeks data collection:** Birth preference; EPDS; CBSEI; WDEQ-A, DCS; PSOC; EQ5D

Q 3

**Post birth 6 week data collection:** Obstetric outcomes; Maternal & neonatal outcomes; EPDS; WDEQ-B; PSOC-12; Postnatal Q;E Q5D
